# Supplementary material for: Molecular characterization of cryptic and sympatric lymnaeid species from the Galba/Fossaria group in Mendoza Province, Northern Patagonia, Argentina
Source: Springer Nature journal article supplement (doi:10.1186/1756-3305-6-304), 2013-10-23

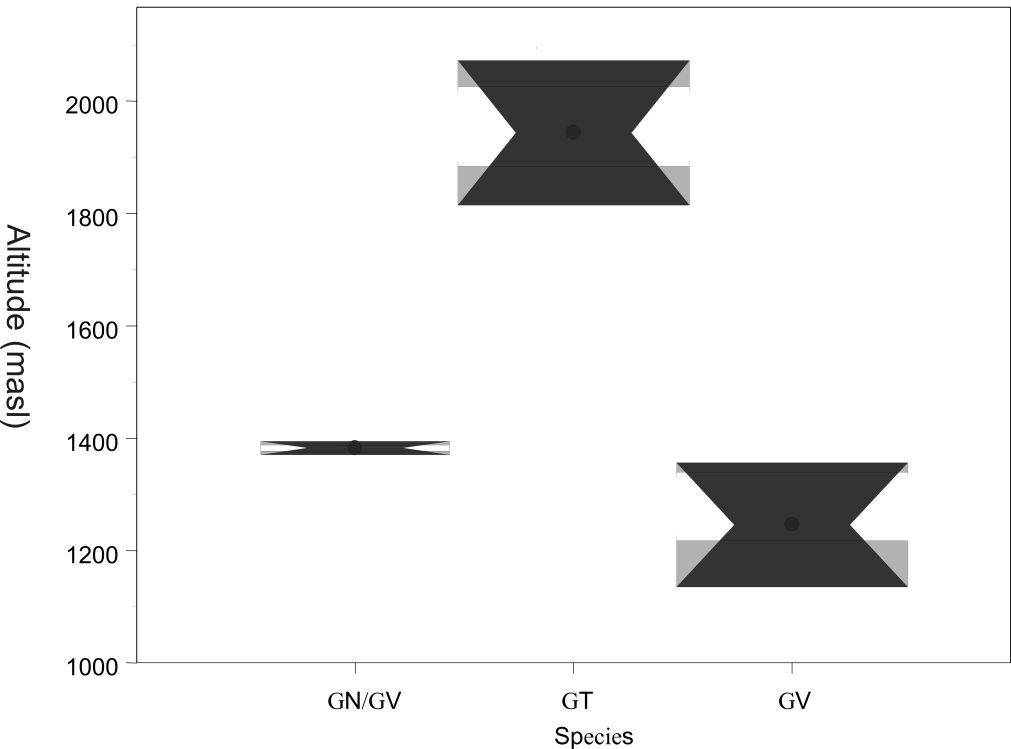

Supplement: 13071_2013_1099_MOESM4_ESM.pdf [file 13071_2013_1099_MOESM4_ESM.pdf]
